# Supplementary material
Source: PubMed Central journal article supplement (PMC2770751)

## Aorta

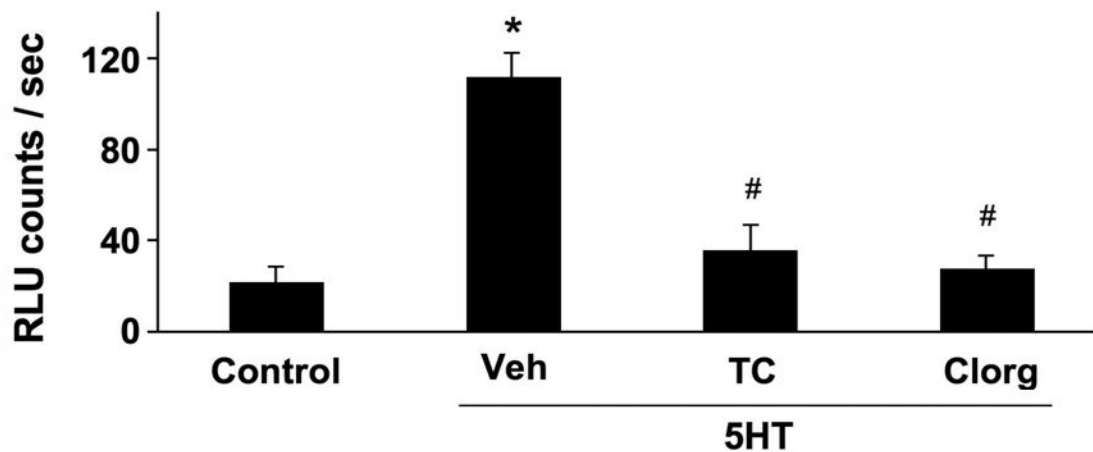

## Mitral Valve

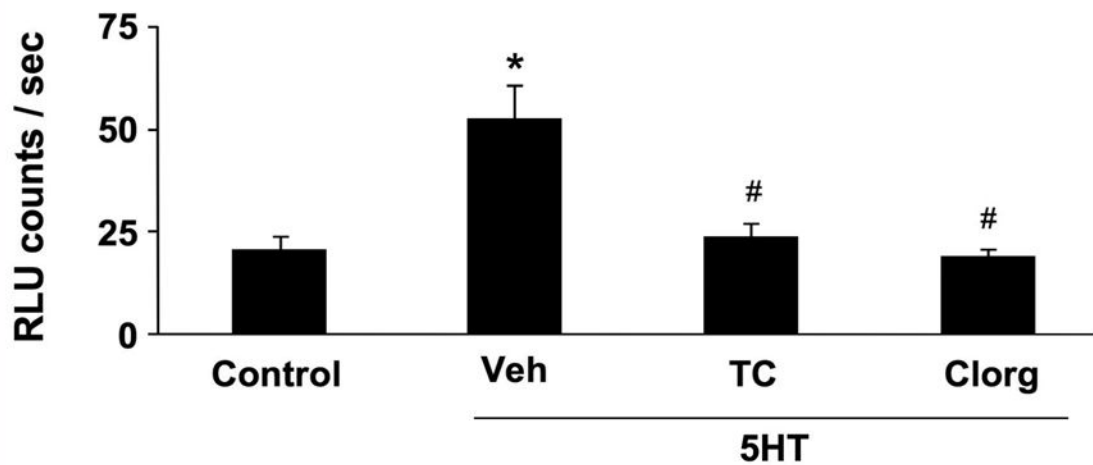

Supplement: 00570.2009_1.pdf [file 00570.2009_1.pdf]

## Tricuspid Valve

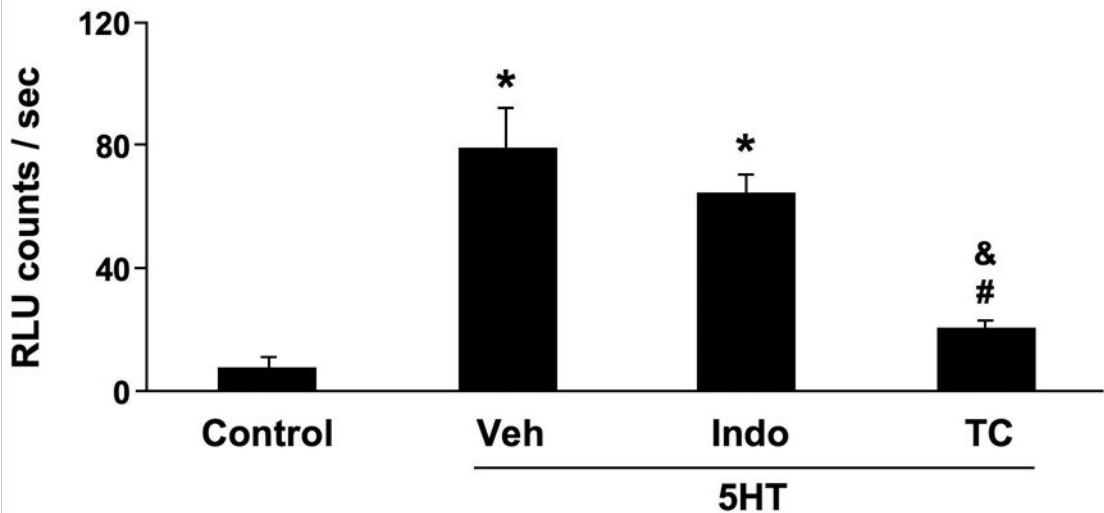

## Pulmonary Artery

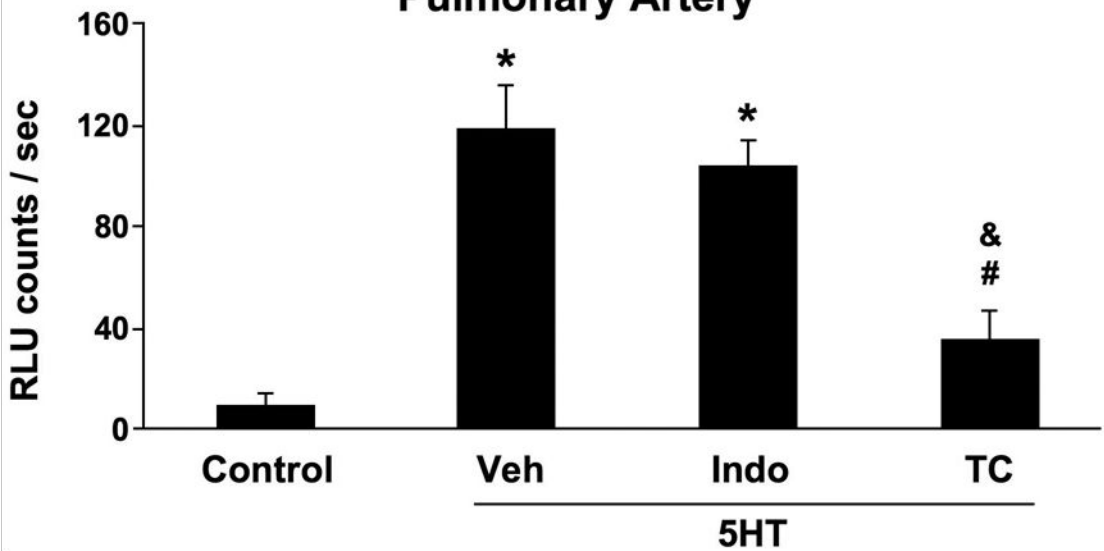

Supplement: 00570.2009_2.pdf [file 00570.2009_2.pdf]

### Tricuspid Valve

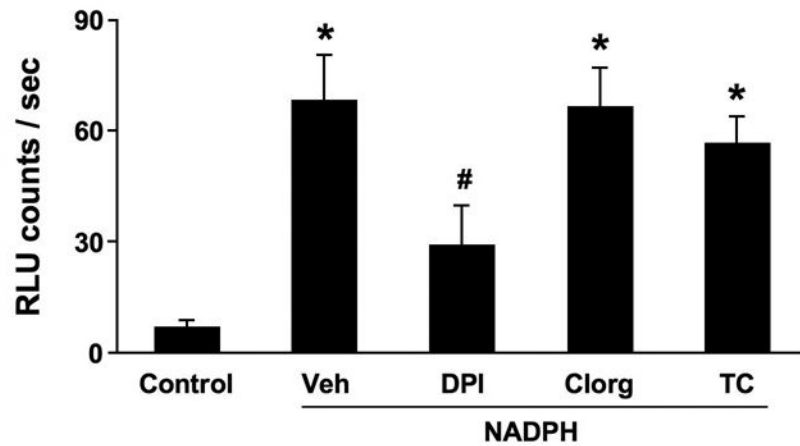

### Pulmonary Valve

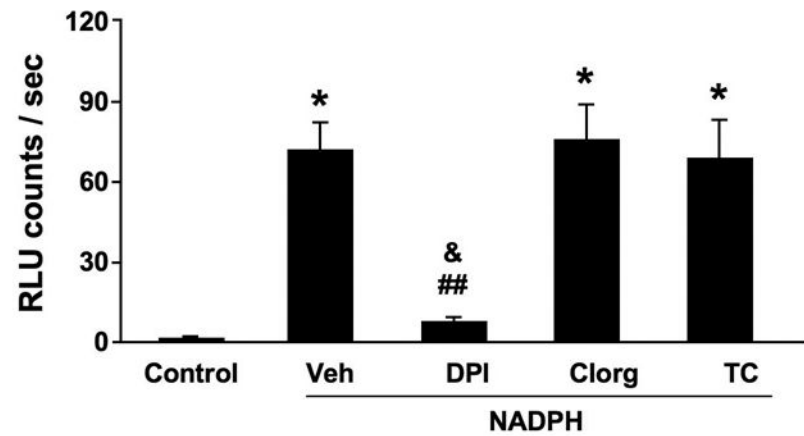

### Pulmonary Artery

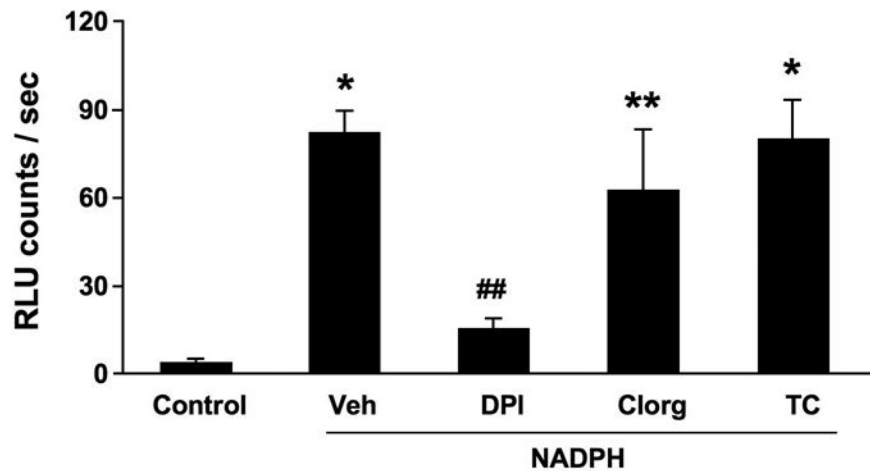

Supplement: 00570.2009_3.pdf [file 00570.2009_3.pdf]
